# Supplementary material for: Profile of Folate in Breast Milk from Chinese Women over 1–400 Days Postpartum
Source: MDPI journal article supplement (doi:10.3390/nu14142962), 2022-07-20
Supplement: s1 [file s1]

**Supplemental (Tables 1–3)**

**Supplemental Table S1.** Comparing the daily consumption between summer and winter groups over the last

| Food item/category              | month of common food  |                       | <i>P</i> value |
|---------------------------------|-----------------------|-----------------------|----------------|
|                                 | Summer( <i>n</i> =54) | Winter( <i>n</i> =57) |                |
| Cereal(g/d)                     | 367.9                 | 377.1                 | >0.05          |
| Potato(g/d)                     | 42.9                  | 64.3                  | >0.05          |
| Beans/dry peas(g/d)             | 35.4                  | 50.0                  | >0.05          |
| Vegetables(g/d)                 | 315.7                 | 271.4                 | >0.05          |
| Fungus, Algae(g/d)              | 12.5                  | 14.8                  | >0.05          |
| Fruits(g/d)                     | 121.4                 | 115.0                 | >0.05          |
| Livestock meat(g/d)             | 117.6                 | 114.3                 | >0.05          |
| Poultry meat(g/d)               | 28.6                  | 14.3                  | >0.05          |
| Milk and dairy products(g/d)    | 250.0                 | 250.0                 | >0.05          |
| Eggs(g/d)                       | 50.0                  | 50.0                  | >0.05          |
| Fish and shrimp and a crab(g/d) | 39.8                  | 35.7                  | >0.05          |

Data represent the median daily consumption of dietary adjusted for portion size. Differences in consumption of dietary between summer and winter groups were assessed by Mann-Whitney Rank Sum test;  $P < 0.05$  was considered significant.

**Supplemental Table S2** Concentration of breast milk folate over 1-400 days postpartum of supplement nonusers

| Folate                   | Days postpartum( <i>n</i> )     |                                 |                                 |                                 |                                 |
|--------------------------|---------------------------------|---------------------------------|---------------------------------|---------------------------------|---------------------------------|
|                          | 1-5d( <i>n</i> =19)             | 10-15d( <i>n</i> =22)           | 40-45d( <i>n</i> =43)           | 200-240d( <i>n</i> =34)         | 300-400d( <i>n</i> =28)         |
| 5-MTHF                   | 8.61(7.70,10.49) <sup>a</sup>   | 19.34(16.85,23.02) <sup>a</sup> | 38.39(24.52,49.02) <sup>b</sup> | 43.42(33.09,52.70) <sup>b</sup> | 41.50(28.66,49.38) <sup>b</sup> |
| UMFA                     | 0.58(0.47,0.69) <sup>a</sup>    | 0.99(0.76,1.38) <sup>b</sup>    | 0.00(0.00,0.00) <sup>a</sup>    | 1.06(0.90,1.70) <sup>b</sup>    | 0.90(0.79,1.29) <sup>b</sup>    |
| The minor reduced folate | 3.79(2.93,4.88) <sup>a</sup>    | 7.11(5.27,11.07) <sup>ab</sup>  | 16.28(11.67,24.74) <sup>d</sup> | 8.76(5.70,11.94) <sup>bc</sup>  | 11.48(9.56,15.54) <sup>cd</sup> |
| Reduced folate           | 12.09(10.81,14.84) <sup>a</sup> | 27.52(22.11,32.02) <sup>a</sup> | 55.08(37.48,72.66) <sup>b</sup> | 52.42(41.69,67.91) <sup>b</sup> | 55.63(39.86,65.96) <sup>b</sup> |
| Total folate             | 12.77(11.41,15.56) <sup>a</sup> | 28.25(23.02,32.97) <sup>a</sup> | 55.08(37.48,72.66) <sup>b</sup> | 55.28(44.64,69.41) <sup>b</sup> | 57.89(41.97,68.32) <sup>b</sup> |

*p* values (2-sided) were derived using the Kruskal–Wallis test, and Bonferroni correction was used for multiple comparisons if there were differences between groups. Values that do not share a lowercase letter are significantly different;  $p < 0.05$  indicates a significant difference during lactational periods.

**Supplemental Table S3** Concentration of breast milk folate over 1-400 days postpartum of supplement users

| Folate                   | Days postpartum( <i>n</i> )     |                                  |                                  |                                 |                                 |
|--------------------------|---------------------------------|----------------------------------|----------------------------------|---------------------------------|---------------------------------|
|                          | 1-5d( <i>n</i> =11)             | 10-15d( <i>n</i> =8)             | 40-45d( <i>n</i> =5)             | 200-240d( <i>n</i> =17)         | 300-400d( <i>n</i> =18)         |
| 5-MTHF                   | 7.92(7.24,9.93) <sup>a</sup>    | 20.94(19.67,24.35) <sup>ab</sup> | 23.64(20.40,66.02) <sup>a</sup>  | 36.54(29.94,44.89) <sup>a</sup> | 32.99(22.30,46.88) <sup>a</sup> |
| UMFA                     | 0.61(0.52,1.06) <sup>a</sup>    | 1.02(0.84,1.23) <sup>ab</sup>    | 9.20(0.75,23.82) <sup>ab</sup>   | 12.84(1.19,41.28) <sup>b</sup>  | 6.22(1.04,14.21) <sup>b</sup>   |
| The minor reduced folate | 3.31(2.50,4.24) <sup>a</sup>    | 6.80(5.80,11.76) <sup>ab</sup>   | 12.41(7.17,28.65) <sup>b</sup>   | 11.77(7.01,15.66) <sup>b</sup>  | 8.78(6.36,16.35) <sup>b</sup>   |
| Reduced folate           | 11.89(10.09,13.58) <sup>a</sup> | 27.45(26.44,40.40) <sup>ab</sup> | 30.57(30.30,94.66) <sup>b</sup>  | 49.53(36.13,61.98) <sup>b</sup> | 42.66(29.04,65.38) <sup>b</sup> |
| Total folate             | 12.95(10.60,15.63) <sup>a</sup> | 28.53(27.33,46.24) <sup>ab</sup> | 39.73(31.08,118.47) <sup>b</sup> | 63.55(46.09,92.86) <sup>b</sup> | 49.47(33.94,79.32) <sup>b</sup> |

*p* values (2-sided) were derived using the Kruskal–Wallis test, and Bonferroni correction was used for multiple comparisons if there were differences between groups. Values that do not share a lowercase letter are significantly different;  $p < 0.05$  indicates a significant difference during lactational periods.
